# Supplementary material for: Statistical Assessment of Some Interpolation Methods for Building Grid Format Digital Bathymetric Models
Source: MDPI journal article supplement (doi:10.3390/rs15082072), 2023-04-14

**Table S1.** Average value of vertical RMSE  $\pm$  Standard deviation (four replicates) for each sample density and morphology tested.

|      |     | Interpolation Methods |                   |                   |                   |      |     | Interpolation Methods |                   |                   |                   |
|------|-----|-----------------------|-------------------|-------------------|-------------------|------|-----|-----------------------|-------------------|-------------------|-------------------|
|      |     | OK                    | UK                | RBMF              | GMRF              |      |     | OK                    | UK                | RBMF              | GMRF              |
| Sec. | SD  | RMSE (m)              | RMSE (m)          | RMSE (m)          | RMSE (m)          | Sec. | SD  | RMSE (m)              | RMSE (m)          | RMSE (m)          | RMSE (m)          |
| Q2   | SD1 | 1.802 $\pm$ 0.103     | 4.216 $\pm$ 0.238 | 1.585 $\pm$ 0.237 | 3.177 $\pm$ 0.153 | Q8   | SD1 | 1.096 $\pm$ 0.100     | 3.584 $\pm$ 0.047 | 1.074 $\pm$ 0.051 | 3.06 $\pm$ 0.074  |
|      | SD2 | 1.562 $\pm$ 0.131     | 2.985 $\pm$ 0.847 | 1.239 $\pm$ 0.162 | 2.348 $\pm$ 0.201 |      | SD2 | 1.013 $\pm$ 0.202     | 1.916 $\pm$ 0.253 | 0.93 $\pm$ 0.211  | 2.086 $\pm$ 0.226 |
|      | SD3 | 1.287 $\pm$ 0.156     | 1.84 $\pm$ 0.068  | 1.083 $\pm$ 0.154 | 1.795 $\pm$ 0.043 |      | SD3 | 0.667 $\pm$ 0.074     | 1.215 $\pm$ 0.203 | 0.607 $\pm$ 0.038 | 1.363 $\pm$ 0.068 |
|      | SD4 | 0.921 $\pm$ 0.043     | 1.216 $\pm$ 0.082 | 0.864 $\pm$ 0.021 | 1.247 $\pm$ 0.034 |      | SD4 | 0.451 $\pm$ 0.048     | 0.829 $\pm$ 0.083 | 0.491 $\pm$ 0.050 | 0.818 $\pm$ 0.081 |
|      | SD5 | 0.621 $\pm$ 0.016     | 0.899 $\pm$ 0.020 | 0.578 $\pm$ 0.007 | 0.843 $\pm$ 0.041 |      | SD5 | 0.338 $\pm$ 0.058     | 0.616 $\pm$ 0.059 | 0.316 $\pm$ 0.046 | 0.589 $\pm$ 0.013 |
|      | SD6 | 0.555 $\pm$ 0.013     | 0.737 $\pm$ 0.028 | 0.586 $\pm$ 0.074 | 0.681 $\pm$ 0.019 |      | SD6 | 0.355 $\pm$ 0.145     | 0.421 $\pm$ 0.083 | 0.735 $\pm$ 0.599 | 0.394 $\pm$ 0.022 |
|      | SD7 | 0.449 $\pm$ 0.015     | 0.538 $\pm$ 0.030 | 0.456 $\pm$ 0.047 | 0.538 $\pm$ 0.025 |      | SD7 | 0.228 $\pm$ 0.031     | 0.328 $\pm$ 0.022 | 0.34 $\pm$ 0.068  | 0.318 $\pm$ 0.012 |
|      | SD8 | 0.347 $\pm$ 0.040     | 0.455 $\pm$ 0.034 | 0.436 $\pm$ 0.127 | 0.436 $\pm$ 0.030 |      | SD8 | 0.182 $\pm$ 0.015     | 0.196 $\pm$ 0.036 | 0.255 $\pm$ 0.118 | 0.265 $\pm$ 0.012 |
| Q3   | SD1 | 1.593 $\pm$ 0.190     | 4.353 $\pm$ 1.461 | 1.349 $\pm$ 0.069 | 3.804 $\pm$ 0.149 | Q15  | SD1 | 0.711 $\pm$ 0.180     | 1.833 $\pm$ 0.484 | 0.532 $\pm$ 0.068 | 1.87 $\pm$ 0.124  |
|      | SD2 | 1.244 $\pm$ 0.325     | 2.549 $\pm$ 0.127 | 1.14 $\pm$ 0.226  | 2.374 $\pm$ 0.059 |      | SD2 | 0.431 $\pm$ 0.073     | 1.291 $\pm$ 0.172 | 0.426 $\pm$ 0.035 | 1.212 $\pm$ 0.155 |
|      | SD3 | 1.178 $\pm$ 0.220     | 1.395 $\pm$ 0.215 | 0.989 $\pm$ 0.140 | 1.729 $\pm$ 0.099 |      | SD3 | 0.46 $\pm$ 0.085      | 1.004 $\pm$ 0.149 | 0.46 $\pm$ 0.063  | 0.973 $\pm$ 0.102 |
|      | SD4 | 0.92 $\pm$ 0.052      | 1.164 $\pm$ 0.118 | 0.776 $\pm$ 0.035 | 1.103 $\pm$ 0.066 |      | SD4 | 0.354 $\pm$ 0.052     | 0.543 $\pm$ 0.100 | 0.29 $\pm$ 0.026  | 0.51 $\pm$ 0.020  |
|      | SD5 | 0.684 $\pm$ 0.042     | 0.782 $\pm$ 0.101 | 0.555 $\pm$ 0.023 | 0.748 $\pm$ 0.020 |      | SD5 | 0.275 $\pm$ 0.017     | 0.408 $\pm$ 0.061 | 0.261 $\pm$ 0.018 | 0.402 $\pm$ 0.036 |
|      | SD6 | 0.536 $\pm$ 0.046     | 0.709 $\pm$ 0.062 | 0.676 $\pm$ 0.063 | 0.601 $\pm$ 0.043 |      | SD6 | 0.222 $\pm$ 0.050     | 0.352 $\pm$ 0.042 | 0.436 $\pm$ 0.289 | 0.307 $\pm$ 0.028 |
|      | SD7 | 0.381 $\pm$ 0.025     | 0.479 $\pm$ 0.066 | 0.478 $\pm$ 0.050 | 0.466 $\pm$ 0.041 |      | SD7 | 0.158 $\pm$ 0.012     | 0.22 $\pm$ 0.014  | 0.288 $\pm$ 0.070 | 0.204 $\pm$ 0.013 |
|      | SD8 | 0.271 $\pm$ 0.050     | 0.376 $\pm$ 0.020 | 0.315 $\pm$ 0.067 | 0.395 $\pm$ 0.025 |      | SD8 | 0.144 $\pm$ 0.012     | 0.19 $\pm$ 0.009  | 0.188 $\pm$ 0.044 | 0.176 $\pm$ 0.014 |
| Q4   | SD1 | 3.526 $\pm$ 0.710     | 5.209 $\pm$ 1.389 | 2.716 $\pm$ 0.286 | 4.697 $\pm$ 0.372 | Q23  | SD1 | 0.13 $\pm$ 0.026      | 0.485 $\pm$ 0.007 | 0.085 $\pm$ 0.009 | 0.427 $\pm$ 0.032 |
|      | SD2 | 2.391 $\pm$ 0.219     | 3.827 $\pm$ 0.180 | 2.34 $\pm$ 0.255  | 3.223 $\pm$ 0.450 |      | SD2 | 0.072 $\pm$ 0.005     | 0.297 $\pm$ 0.021 | 0.085 $\pm$ 0.022 | 0.276 $\pm$ 0.013 |
|      | SD3 | 1.951 $\pm$ 0.146     | 2.596 $\pm$ 0.462 | 1.716 $\pm$ 0.022 | 2.464 $\pm$ 0.246 |      | SD3 | 0.049 $\pm$ 0.005     | 0.149 $\pm$ 0.016 | 0.06 $\pm$ 0.008  | 0.147 $\pm$ 0.013 |
|      | SD4 | 1.745 $\pm$ 0.127     | 1.933 $\pm$ 0.280 | 1.342 $\pm$ 0.091 | 1.908 $\pm$ 0.219 |      | SD4 | 0.043 $\pm$ 0.004     | 0.096 $\pm$ 0.007 | 0.046 $\pm$ 0.005 | 0.083 $\pm$ 0.006 |
|      | SD5 | 1.245 $\pm$ 0.131     | 1.643 $\pm$ 0.215 | 1.156 $\pm$ 0.123 | 1.524 $\pm$ 0.171 |      | SD5 | 0.041 $\pm$ 0.003     | 0.068 $\pm$ 0.013 | 0.038 $\pm$ 0.003 | 0.055 $\pm$ 0.004 |
|      | SD6 | 1.043 $\pm$ 0.011     | 1.251 $\pm$ 0.025 | 0.979 $\pm$ 0.039 | 1.128 $\pm$ 0.032 |      | SD6 | 0.035 $\pm$ 0.002     | 0.047 $\pm$ 0.005 | 0.054 $\pm$ 0.005 | 0.043 $\pm$ 0.001 |
|      | SD7 | 0.772 $\pm$ 0.023     | 0.977 $\pm$ 0.052 | 0.789 $\pm$ 0.059 | 0.857 $\pm$ 0.027 |      | SD7 | 0.028 $\pm$ 0.001     | 0.037 $\pm$ 0.004 | 0.044 $\pm$ 0.007 | 0.034 $\pm$ 0.001 |
|      | SD8 | 0.626 $\pm$ 0.013     | 0.814 $\pm$ 0.014 | 0.607 $\pm$ 0.031 | 0.752 $\pm$ 0.021 |      | SD8 | 0.025 $\pm$ 0.001     | 0.033 $\pm$ 0.003 | 0.03 $\pm$ 0.001  | 0.029 $\pm$ 0.001 |

**Table S2.** Results of ANOVA test for the RMSE statistic.

|                                  | Sum of Squares (SS) | Degree of freedom (DG) | Mean sum of squares (MS) | F      | p-value  |
|----------------------------------|---------------------|------------------------|--------------------------|--------|----------|
| <b>Sampling Density (SD)</b>     | 287.7738            | 7                      | 41.1105                  | 720.90 | 0.000000 |
| <b>Morphology (M)</b>            | 237.0265            | 5                      | 47.4053                  | 831.28 | 0.000000 |
| <b>Interpolation Method (IM)</b> | 44.7461             | 3                      | 14.9154                  | 261.55 | 0.000000 |
| <b>SD*M</b>                      | 80.7135             | 35                     | 2.3061                   | 40.44  | 0.000000 |
| <b>SD*IM</b>                     | 61.7794             | 21                     | 2.9419                   | 51.59  | 0.000000 |
| <b>M*IM</b>                      | 8.6532              | 15                     | 0.5769                   | 10.12  | 0.000000 |
| <b>SD*M*IM</b>                   | 14.3016             | 105                    | 0.1362                   | 2.39   | 0.000000 |
| <b>Error</b>                     | 32.8474             | 576                    | 0.0570                   |        |          |

**Figure S1.** Trend graph of the RMSE of the residuals ( $Z_{interpolated} - Z_{checkpoint}$ ) with respect to the factor Sampling Density. For each SD all morphologies and interpolation methods are included. Vertical bars denote 0.95 confidence intervals. Different letters between sampling densities indicate significant differences according to Tukey's test ( $p < 0.05$ ).

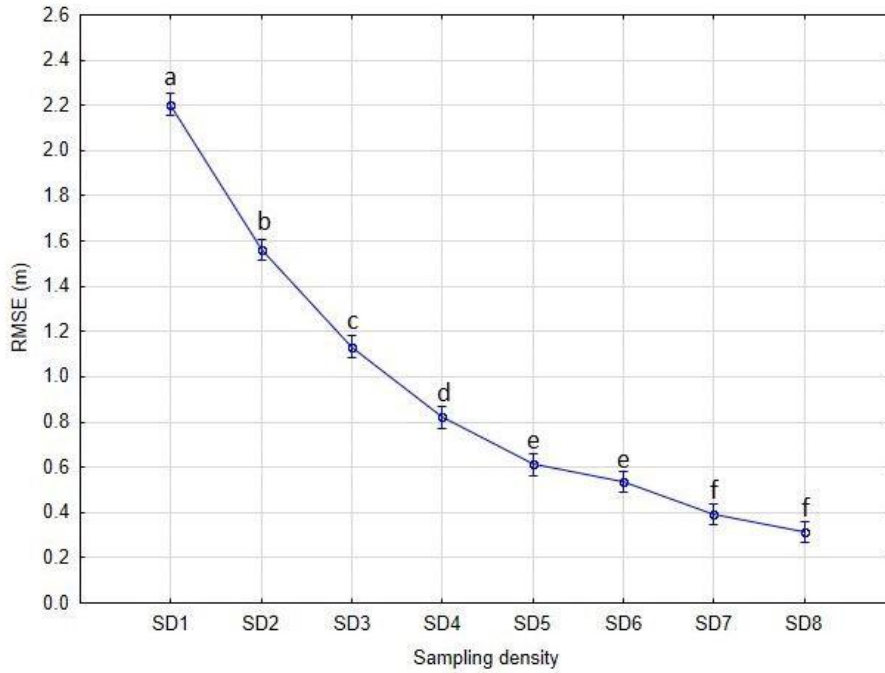

**Figure S2.** Trend graph of the RMSE of the residuals ( $Z_{interpolated} - Z_{checkpoint}$ ) with respect to the factor Morphology. Vertical bars denote 0.95 confidence intervals. Different letters between morphologies indicate significant differences according to Tukey's test ( $p < 0.05$ ).

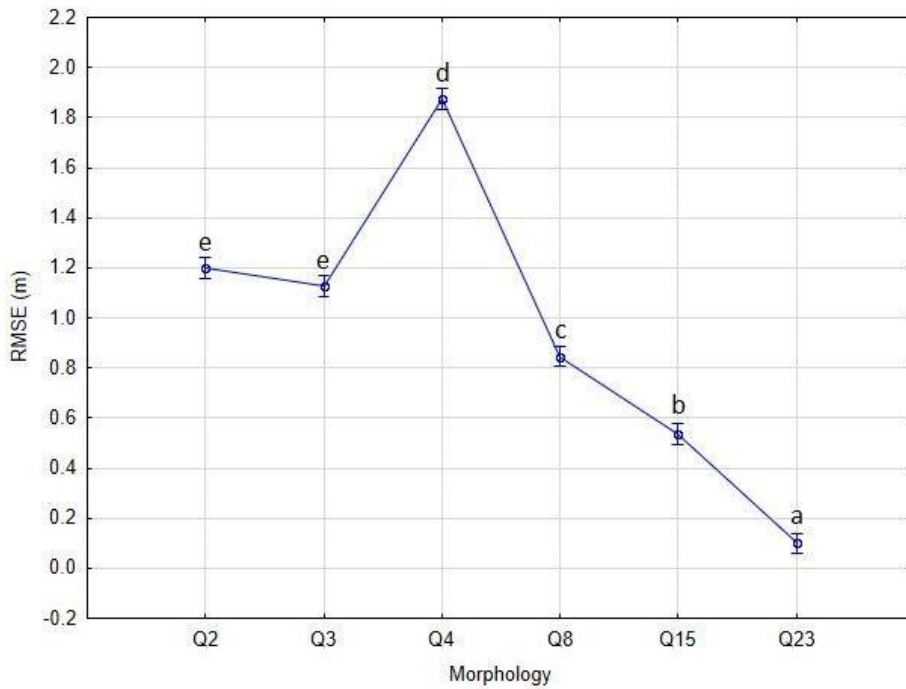

**Figure S3.** Trend graph of the RMSE of the residuals ( $Z_{\text{interpolated}} - Z_{\text{checkpoint}}$ ) with respect to the factor Interpolation Method. Vertical bars denote 0.95 confidence intervals. Different letters between interpolation methods indicate significant differences according to Tukey's test ( $p < 0.05$ ).

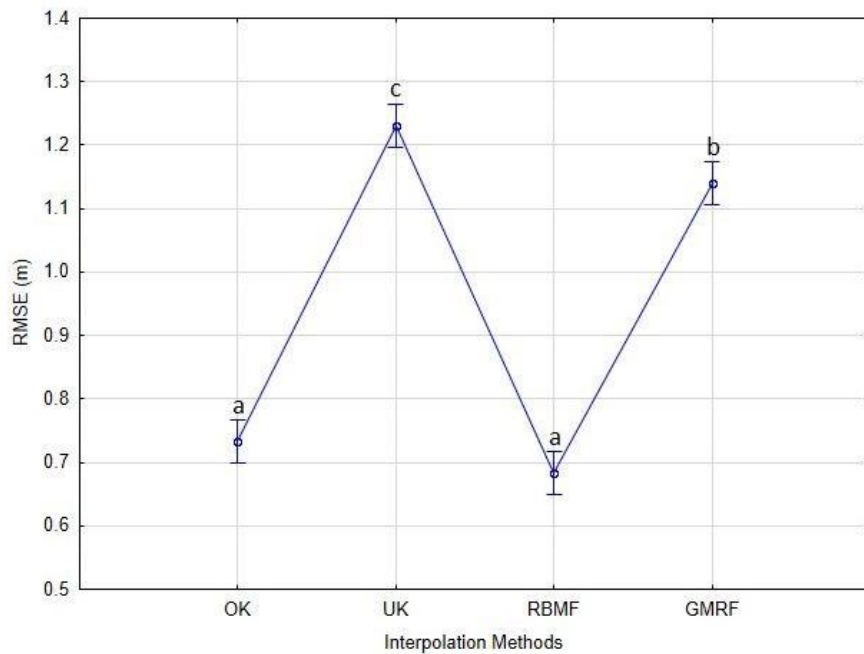

**Figure S4.** Trend graph of the RMSE of the residuals ( $Z_{\text{interpolated}} - Z_{\text{checkpoint}}$ ) with respect to the interaction between Sampling Density and Morphology. Vertical bars denote 0.95 confidence intervals.

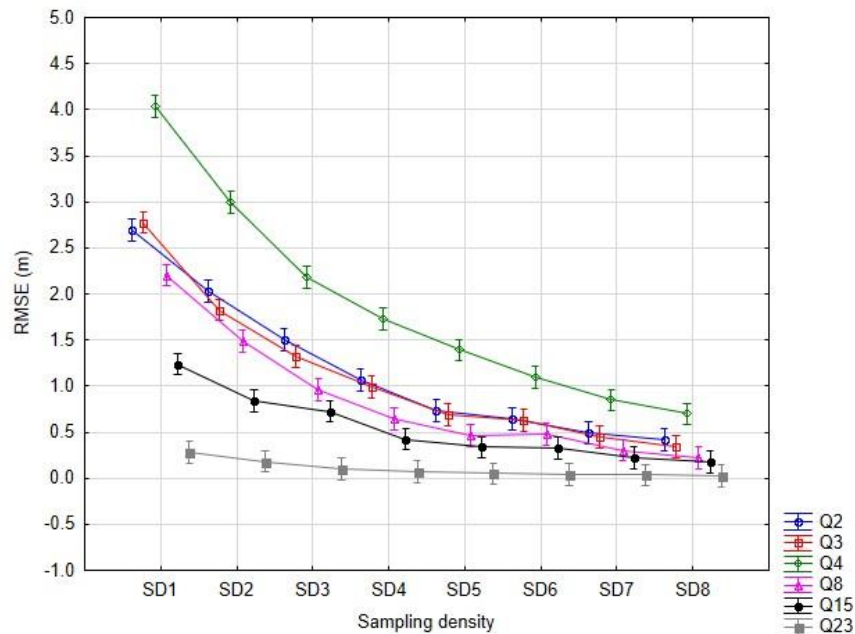

**Figure S5.** Trend graph of the RMSE of the residuals ( $Z_{\text{interpolated}} - Z_{\text{checkpoint}}$ ) with respect to the interaction between Sampling Density and Interpolation Method. Vertical bars denote 0.95 confidence intervals.

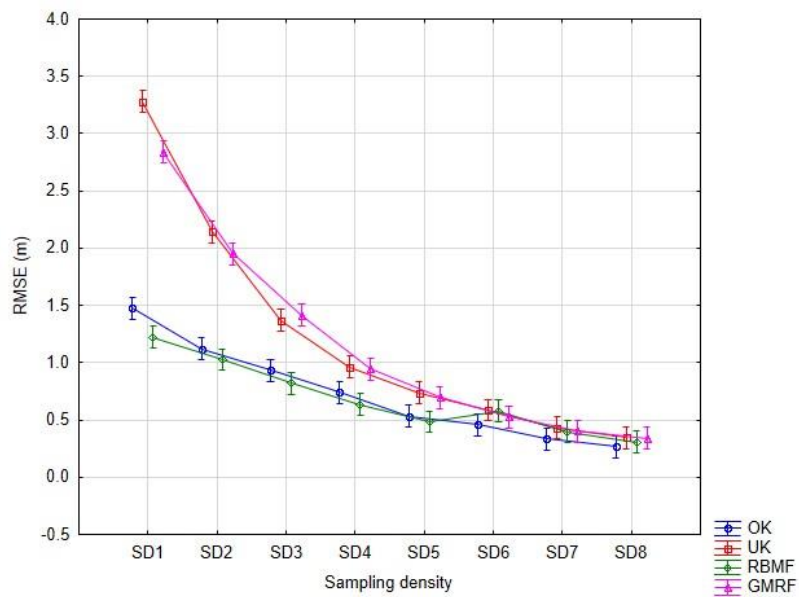

**Figure S6.** Trend graph of the RMSE of the residuals ( $Z_{\text{interpolated}} - Z_{\text{checkpoint}}$ ) with respect to the interaction between Morphology and Interpolation Method. Vertical bars denote 0.95 confidence intervals.

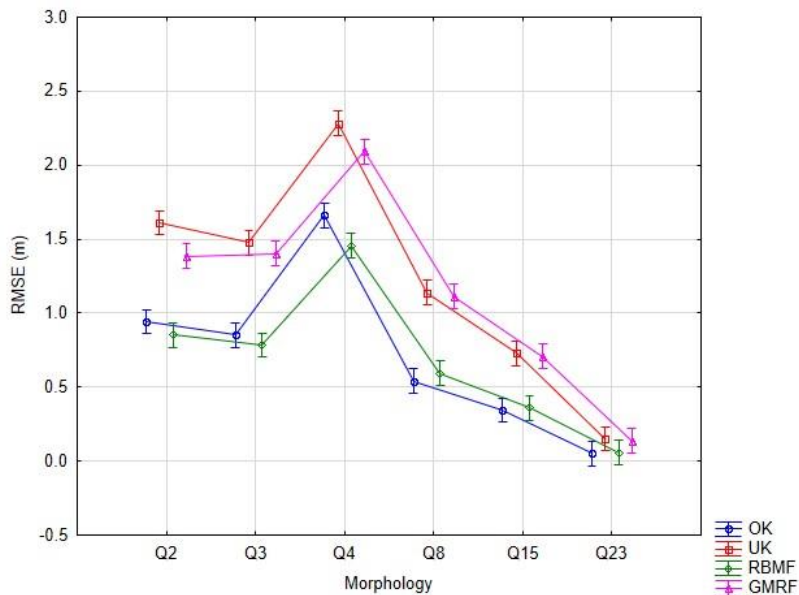

Supplement: s1 [file s1]
